# Supplementary material for: Genome-wide analysis of R2R3-MYB transcription factors family in the autopolyploid Saccharum spontaneum: an exploration of dominance expression and stress response
Source: BMC Genomics. 2021 Aug 18;22:622. doi: 10.1186/s12864-021-07689-w (PMC8371785; doi:10.1186/s12864-021-07689-w)
Supplement: Supplementary file 5 — Additional file 5: Table S5. Tandem duplication genes and segmental duplication genes in the SsR2R3-MYB gene family. [file 12864_2021_7689_MOESM5_ESM.xlsx]

## Sheet: tandem duplication genes
Name	Gene ID	Chr	Start	End
SsMYB2-1	Sspon.01G0009150-1A	Chr1A	25707349	25710789
SsMYB10-1	Sspon.01G0028930-1P	Chr1A	100121206	100122460
SsMYB11-1	Sspon.01G0028930-1A	Chr1A	100833940	100835188
SsMYB12-1	Sspon.01G0037750-1B	Chr1B	25515812	25517895
SsMYB13-1	Sspon.01G0037750-1T	Chr1B	25536658	25538538
SsMYB16-1	Sspon.01G0019490-1P	Chr1B	78310591	78312510
SsMYB5-2	Sspon.01G0019490-2B	Chr1B	78497035	78499180
SsMYB19-1	Sspon.01G0038770-2C	Chr1C	22421188	22423293
SsMYB2-2	Sspon.01G0009150-2C	Chr1C	22755612	22764455
SsMYB23-1	Sspon.01G0038440-1P	Chr1D	23147126	23149326
SsMYB24-1	Sspon.01G0038440-3P	Chr1D	25233226	25235081
SsMYB32-1	Sspon.02G0014200-1P	Chr2A	37896160	37897562
SsMYB35-1	Sspon.02G0015010-1P	Chr2A	40516475	40517509
SsMYB39-1	Sspon.02G0027270-1A	Chr2A	98886279	98895901
SsMYB42-1	Sspon.02G0032360-1A	Chr2A	120048600	120049370
SsMYB45-1	Sspon.02G0003090-2B	Chr2B	8632939	8637234
SsMYB46-1	Sspon.02G0033760-1B	Chr2B	8744421	8748963
SsMYB48-1	Sspon.06G0003930-1P	Chr2B	24367880	24368875
SsMYB8-2	Sspon.02G0015020-2B	Chr2B	38684354	38685301
SsMYB80-2	Sspon.03G0018470-1A	Chr3A	57023419	57024354
SsMYB68-2	Sspon.03G0016200-2B	Chr3B	75278050	75279478
SsMYB80-1	Sspon.03G0018470-2B	Chr3B	76964080	76965215
SsMYB82-1	Sspon.03G0021720-2B	Chr3B	88548960	88549871
SsMYB89-1	Sspon.03G0030130-1P	Chr3C	28033307	28037597
SsMYB68-3	Sspon.03G0016200-3C	Chr3C	71710437	71712603
SsMYB92-1	Sspon.03G0016200-3T	Chr3C	71716512	71718035
SsMYB93-1	Sspon.03G0018470-1T	Chr3C	73765593	73766758
SsMYB94-1	Sspon.03G0019490-1P	Chr3C	80300020	80301272
SsMYB95-1	Sspon.03G0019490-3C	Chr3C	80407839	80409093
SsMYB63-3	Sspon.03G0009150-3D	Chr3D	28885334	28886572
SsMYB77-2	Sspon.03G0031760-2D	Chr3D	28976532	28977850
SsMYB112-2	Sspon.04G0000680-1A	Chr4A	3047568	3049103
SsMYB99-1	Sspon.04G0004230-1A	Chr4A	12722323	12723246
SsMYB105-1	Sspon.04G0022610-1P	Chr4B	7793016	7794529
SsMYB106-1	Sspon.04G0022610-1B	Chr4B	7945844	7947667
SsMYB112-3	Sspon.04G0000680-2B	Chr4B	17939031	17940557
SsMYB115-2	Sspon.05G0004230-2C	Chr4C	15954427	15955797
SsMYB107-3	Sspon.04G0000650-3C	Chr4C	20858249	20860831
SsMYB108-1	Sspon.05G0013100-3P	Chr4C	23094857	23095738
SsMYB109-1	Sspon.05G0013100-2P	Chr4C	23125853	23126734
SsMYB101-2	Sspon.04G0011570-2D	Chr4D	7558276	7560617
SsMYB110-1	Sspon.04G0011570-1P	Chr4D	7655704	7658107
SsMYB106-2	Sspon.04G0022610-2D	Chr4D	13190951	13192465
SsMYB111-1	Sspon.04G0022610-2P	Chr4D	13326173	13327682
SsMYB99-2	Sspon.04G0004230-2D	Chr4D	13404847	13406150
SsMYB121-1	Sspon.05G0016360-1A	Chr5A	66707537	66710007
SsMYB138-2	Sspon.05G0018090-1A	Chr5A	76105020	76107558
SsMYB123-1	Sspon.05G0023530-1B	Chr5B	7690876	7692267
SsMYB124-1	Sspon.04G0000680-2P	Chr5B	14173606	14174867
SsMYB125-1	Sspon.05G0024340-1B	Chr5B	14203825	14205168
SsMYB118-2	Sspon.05G0009350-2B	Chr5B	22196396	22198087
SsMYB129-1	Sspon.04G0009700-2P	Chr5B	23257816	23260044
SsMYB132-1	Sspon.04G0000650-2P	Chr5C	11749657	11752440
SsMYB133-1	Sspon.04G0000650-3P	Chr5C	11791780	11794562
SsMYB134-1	Sspon.05G0009350-1P	Chr5C	18431949	18433219
SsMYB118-3	Sspon.05G0009350-3C	Chr5C	18482614	18483915
SsMYB147-1	Sspon.06G0019220-1B	Chr6B	844409	845581
SsMYB150-1	Sspon.02G0014700-3P	Chr6B	17533760	17534861
SsMYB157-3	Sspon.06G0005920-2B	Chr6B	18005696	18007243
SsMYB168-1	Sspon.07G0014190-1A	Chr7A	51238256	51239519
SsMYB169-1	Sspon.07G0015250-1A	Chr7A	54472064	54473170
SsMYB172-1	Sspon.07G0019440-1A	Chr7A	71435962	71436834
SsMYB173-1	Sspon.07G0019440-1P	Chr7A	71500936	71501820
SsMYB174-1	Sspon.07G0019440-3P	Chr7A	71616751	71617315
SsMYB175-1	Sspon.07G0019440-2P	Chr7A	71635852	71636554
SsMYB178-1	Sspon.07G0010070-1T	Chr7B	28071613	28072653
SsMYB180-1	Sspon.07G0014190-1P	Chr7B	56351729	56352991
SsMYB181-1	Sspon.07G0015250-1P	Chr7B	58285570	58286720
SsMYB169-2	Sspon.07G0015250-2B	Chr7B	58763188	58764357
SsMYB184-1	Sspon.07G0019860-1P	Chr7B	77768948	77770387
SsMYB172-2	Sspon.07G0019440-2C	Chr7C	74280711	74281413
SsMYB187-1	Sspon.07G0019440-1T	Chr7C	74357538	74358240
SsMYB188-1	Sspon.05G0020540-4P	Chr7C	82435789	82436685
SsMYB189-1	Sspon.07G0017530-3C	Chr7C	82584622	82594255
SsMYB169-4	Sspon.07G0015250-4D	Chr7D	38201796	38202896
SsMYB191-1	Sspon.07G0015250-1T	Chr7D	38215382	38216484
SsMYB168-2	Sspon.07G0014190-3D	Chr7D	45924339	45925600
SsMYB167-4	Sspon.07G0014090-4D	Chr7D	50465661	50466635
SsMYB192-1	Sspon.07G0015250-2P	Chr7D	52697890	52699035
SsMYB193-1	Sspon.07G0019440-4P	Chr7D	71021875	71022759
SsMYB172-3	Sspon.07G0019440-3D	Chr7D	71133314	71134198
SsMYB194-1	Sspon.05G0020540-5P	Chr7D	79583706	79584602
SsMYB122-2	Sspon.05G0020540-4D	Chr7D	79708355	79709266
SsMYB199-1	Sspon.04G0016420-1T	Chr8C	16230725	16231645
SsMYB103-3	Sspon.04G0016420-3C	Chr8C	16257493	16258383
SsMYB197-3	Sspon.08G0012170-3C	Chr8C	49736924	49738012
SsMYB200-1	Sspon.08G0012170-1P	Chr8C	49827420	49828463
SsMYB201-1	Sspon.08G0012170-2P	Chr8C	49844354	49845710
SsMYB195-4	Sspon.08G0006350-3D	Chr8D	16745056	16748844
SsMYB202-1	Sspon.08G0024260-1P	Chr8D	49570465	49578562
SsMYB198-2	Sspon.08G0024260-2D	Chr8D	65045811	65046950

## Sheet: segmental duplication genes
Name	Gene ID	Chr	Start	End
SsMYB1-1	Sspon.01G0002470-1A	Chr1A	6625877	6627056
SsMYB22-2	Sspon.01G0008110-1A	Chr1A	22673441	22678940
SsMYB3-1	Sspon.01G0010650-1A	Chr1A	29615272	29616633
SsMYB4-1	Sspon.01G0010890-1A	Chr1A	30191525	30192566
SsMYB6-1	Sspon.01G0020710-1A	Chr1A	76774253	76777704
SsMYB9-1	Sspon.01G0027410-1A	Chr1A	96063793	96065756
SsMYB18-1	Sspon.01G0038770-1P	Chr1C	22305125	22307243
SsMYB20-1	Sspon.01G0038470-2C	Chr1C	22694708	22703362
SsMYB3-2	Sspon.01G0010650-2C	Chr1C	29997257	29998502
SsMYB21-1	Sspon.01G0012110-2C	Chr1C	32669120	32670915
SsMYB6-3	Sspon.01G0020710-3C	Chr1C	77678158	77679371
SsMYB9-2	Sspon.01G0027410-2C	Chr1C	94310009	94311648
SsMYB1-2	Sspon.01G0002470-2D	Chr1D	6628307	6629489
SsMYB19-2	Sspon.01G0038770-3D	Chr1D	21166610	21168661
SsMYB22-1	Sspon.01G0008110-3D	Chr1D	22033322	22037471
SsMYB3-3	Sspon.01G0010650-3D	Chr1D	31997774	31999055
SsMYB26-1	Sspon.02G0033720-1P	Chr1D	32679446	32680517
SsMYB21-2	Sspon.01G0012110-3D	Chr1D	36368628	36370437
SsMYB6-4	Sspon.01G0020710-4D	Chr1D	74304810	74305953
SsMYB27-1	Sspon.01G0027300-2D	Chr1D	90438282	90439671
SsMYB28-1	Sspon.02G0000760-1A	Chr2A	2665137	2666249
SsMYB29-1	Sspon.01G0010650-1P	Chr2A	8427252	8428844
SsMYB30-1	Sspon.01G0010890-1P	Chr2A	10070276	10071750
SsMYB31-1	Sspon.02G0014200-1A	Chr2A	37833814	37835197
SsMYB33-1	Sspon.02G0015010-1A	Chr2A	40473043	40473992
SsMYB34-1	Sspon.02G0015020-1P	Chr2A	40496372	40505369
SsMYB36-1	Sspon.02G0018240-1A	Chr2A	58547482	58548555
SsMYB38-1	Sspon.02G0027270-1P	Chr2A	98862010	98869667
SsMYB40-1	Sspon.02G0027790-1A	Chr2A	100985252	100987815
SsMYB41-1	Sspon.02G0032360-1T	Chr2A	120036728	120037459
SsMYB28-2	Sspon.02G0000760-2B	Chr2B	3315565	3316700
SsMYB43-1	Sspon.01G0039760-1P	Chr2B	7534718	7536680
SsMYB44-1	Sspon.02G0033720-1B	Chr2B	8558407	8559718
SsMYB47-1	Sspon.02G0000080-2B	Chr2B	16387080	16388506
SsMYB31-2	Sspon.02G0014200-2B	Chr2B	35850626	35852028
SsMYB33-2	Sspon.02G0015010-2B	Chr2B	38671105	38672139
SsMYB49-1	Sspon.02G0038080-1B	Chr2B	38705703	38706582
SsMYB54-3	Sspon.02G0028760-2B	Chr2B	97011802	97014094
SsMYB40-2	Sspon.02G0027790-2B	Chr2B	100840395	100843150
SsMYB51-1	Sspon.02G0044620-1B	Chr2B	103126860	103131223
SsMYB42-2	Sspon.02G0032360-2B	Chr2B	112376684	112377454
SsMYB28-3	Sspon.02G0000760-3C	Chr2C	3089042	3090078
SsMYB15-2	Sspon.01G0039760-2C	Chr2C	8631914	8652033
SsMYB44-2	Sspon.02G0033720-2C	Chr2C	9124368	9125786
SsMYB48-3	Sspon.06G0003930-3C	Chr2C	28516963	28517831
SsMYB33-3	Sspon.02G0015010-3C	Chr2C	45282931	45283965
SsMYB8-3	Sspon.02G0015020-3C	Chr2C	45295560	45304561
SsMYB36-2	Sspon.02G0018240-2C	Chr2C	61454134	61455402
SsMYB52-2	Sspon.02G0044740-2C	Chr2C	114485168	114486307
SsMYB51-2	Sspon.02G0044620-2C	Chr2C	115455416	115456328
SsMYB39-2	Sspon.02G0027270-2C	Chr2C	123163547	123168518
SsMYB28-4	Sspon.02G0000760-4D	Chr2D	4462283	4463397
SsMYB44-3	Sspon.02G0033720-3D	Chr2D	7207728	7208922
SsMYB31-3	Sspon.02G0014200-3D	Chr2D	31449655	31451039
SsMYB33-4	Sspon.02G0015010-4D	Chr2D	34701462	34702496
SsMYB36-3	Sspon.02G0018240-3D	Chr2D	54407014	54408111
SsMYB42-3	Sspon.02G0032360-3D	Chr2D	87073179	87073910
SsMYB54-1	Sspon.02G0028760-4D	Chr2D	97136833	97138686
SsMYB52-3	Sspon.02G0044740-3D	Chr2D	99185605	99186753
SsMYB40-3	Sspon.02G0027790-3D	Chr2D	104578317	104580962
SsMYB39-3	Sspon.02G0027270-3D	Chr2D	107542381	107553370
SsMYB55-1	Sspon.03G0000150-1A	Chr3A	348086	353930
SsMYB56-1	Sspon.03G0002490-1P	Chr3A	6187780	6188779
SsMYB60-1	Sspon.03G0007910-1A	Chr3A	21348160	21350297
SsMYB63-1	Sspon.03G0009150-1A	Chr3A	25139899	25141181
SsMYB64-1	Sspon.03G0010460-1A	Chr3A	28592384	28593350
SsMYB66-1	Sspon.03G0014130-1A	Chr3A	43949792	43950478
SsMYB67-1	Sspon.03G0015440-1P	Chr3A	49496544	49501681
SsMYB68-1	Sspon.03G0016200-1A	Chr3A	51596818	51598711
SsMYB69-1	Sspon.03G0018460-1A	Chr3A	56994483	56995461
SsMYB70-1	Sspon.03G0018480-1A	Chr3A	57045511	57046066
SsMYB72-1	Sspon.03G0021720-1P	Chr3A	66074536	66075450
SsMYB96-2	Sspon.03G0022850-1A	Chr3A	69761448	69762805
SsMYB73-1	Sspon.03G0024710-1P	Chr3A	75077236	75083536
SsMYB74-1	Sspon.03G0027840-1B	Chr3B	6950385	6961243
SsMYB58-2	Sspon.03G0005140-2B	Chr3B	13455208	13456564
SsMYB164-2	Sspon.07G0006770-2B	Chr3B	15694493	15695477
SsMYB75-1	Sspon.03G0030130-1B	Chr3B	19799820	19802411
SsMYB76-1	Sspon.03G0031360-1B	Chr3B	27195116	27196662
SsMYB60-2	Sspon.03G0007910-2B	Chr3B	28399372	28401753
SsMYB64-2	Sspon.03G0010460-2B	Chr3B	35430419	35431392
SsMYB66-2	Sspon.03G0014130-2B	Chr3B	65761847	65764504
SsMYB90-2	Sspon.03G0015440-2B	Chr3B	73245846	73252088
SsMYB167-2	Sspon.07G0014090-2B	Chr3B	74038944	74039879
SsMYB79-1	Sspon.03G0016200-1T	Chr3B	75266813	75268848
SsMYB70-2	Sspon.03G0018480-2B	Chr3B	76843683	76844748
SsMYB69-2	Sspon.03G0018460-2B	Chr3B	76933410	76934385
SsMYB81-1	Sspon.03G0035340-1B	Chr3B	79958040	79958685
SsMYB95-2	Sspon.03G0019490-2B	Chr3B	82823469	82824864
SsMYB83-1	Sspon.03G0036190-1B	Chr3B	88621280	88622383
SsMYB84-1	Sspon.03G0022850-1P	Chr3B	92159995	92160977
SsMYB85-1	Sspon.03G0024750-2B	Chr3B	98567313	98573342
SsMYB87-1	Sspon.02G0027270-2P	Chr3C	10349979	10353509
SsMYB88-1	Sspon.03G0002490-3C	Chr3C	21575585	21576570
SsMYB75-2	Sspon.03G0030130-2C	Chr3C	27423058	27427459
SsMYB60-3	Sspon.03G0007910-3C	Chr3C	36220322	36222187
SsMYB64-3	Sspon.03G0010460-3C	Chr3C	43960653	43961645
SsMYB90-1	Sspon.03G0015440-3C	Chr3C	69901969	69908494
SsMYB167-3	Sspon.07G0014090-3C	Chr3C	70473155	70474090
SsMYB91-1	Sspon.03G0016200-2T	Chr3C	71682071	71683462
SsMYB80-3	Sspon.03G0018470-3C	Chr3C	73601309	73602244
SsMYB81-2	Sspon.03G0035340-2C	Chr3C	77263086	77264223
SsMYB83-2	Sspon.03G0036190-2C	Chr3C	84597730	84598772
SsMYB96-1	Sspon.03G0022850-3C	Chr3C	88399825	88400760
SsMYB58-4	Sspon.03G0005140-4D	Chr3D	11969206	11970116
SsMYB76-2	Sspon.03G0031360-2D	Chr3D	25418973	25420123
SsMYB60-4	Sspon.03G0007910-4D	Chr3D	26332562	26334679
SsMYB68-4	Sspon.03G0016200-4D	Chr3D	38154925	38157091
SsMYB80-4	Sspon.03G0018470-4D	Chr3D	39725832	39727059
SsMYB98-1	Sspon.03G0035610-2D	Chr3D	46438439	46482153
SsMYB139-1	Sspon.06G0003930-1A	Chr6A	11979778	11980800
SsMYB140-1	Sspon.02G0014700-1P	Chr6A	19571640	19572748
SsMYB157-2	Sspon.06G0005920-1A	Chr6A	19911135	19912608
SsMYB142-1	Sspon.02G0015010-2P	Chr6A	20952913	20954285
SsMYB143-1	Sspon.06G0008220-1A	Chr6A	43278256	43279418
SsMYB145-1	Sspon.06G0018820-1A	Chr6A	102745417	102748292
SsMYB146-1	Sspon.06G0019220-1P	Chr6B	806721	807770
SsMYB48-2	Sspon.06G0003930-2B	Chr6B	10063613	10064736
SsMYB148-1	Sspon.06G0021460-1B	Chr6B	15752558	15753205
SsMYB149-1	Sspon.02G0014700-2P	Chr6B	17507698	17508899
SsMYB151-1	Sspon.06G0005920-1T	Chr6B	17998958	18000916
SsMYB153-1	Sspon.06G0027690-1T	Chr6B	88496159	88497395
SsMYB147-2	Sspon.06G0019220-2D	Chr6D	719335	720980
SsMYB48-4	Sspon.06G0003930-4D	Chr6D	9463819	9464723
SsMYB148-2	Sspon.06G0021460-2D	Chr6D	16517584	16528553
SsMYB156-1	Sspon.02G0014700-5P	Chr6D	18000575	18001728
SsMYB157-1	Sspon.06G0005920-4D	Chr6D	18512132	18513782
SsMYB158-1	Sspon.02G0015010-3P	Chr6D	19429312	19430825
SsMYB143-2	Sspon.06G0008220-2D	Chr6D	31812947	31814040
SsMYB159-1	Sspon.06G0027690-2D	Chr6D	90807647	90809048
SsMYB161-1	Sspon.03G0009150-1P	Chr7A	6358942	6360559
SsMYB164-1	Sspon.07G0006770-1A	Chr7A	17504840	17506462
SsMYB165-1	Sspon.07G0010070-1A	Chr7A	29789851	29790909
SsMYB166-1	Sspon.07G0013680-1A	Chr7A	49364401	49365968
SsMYB167-1	Sspon.07G0014090-1A	Chr7A	50899349	50900589
SsMYB170-1	Sspon.05G0020540-1P	Chr7A	63167789	63168691
SsMYB171-1	Sspon.07G0019180-1A	Chr7A	69760242	69763426
SsMYB176-1	Sspon.07G0019860-1A	Chr7A	73533374	73547435
SsMYB63-2	Sspon.03G0009150-2B	Chr7B	5319231	5320499
SsMYB88-2	Sspon.03G0002490-2B	Chr7B	15953767	15954861
SsMYB165-2	Sspon.07G0010070-2B	Chr7B	28062213	28063176
SsMYB166-2	Sspon.07G0013680-2B	Chr7B	55386932	55388499
SsMYB179-1	Sspon.07G0014190-2P	Chr7B	56168782	56170048
SsMYB182-1	Sspon.05G0020540-3P	Chr7B	67593692	67594675
SsMYB171-2	Sspon.07G0019180-2B	Chr7B	74844359	74849124
SsMYB183-1	Sspon.07G0019860-1T	Chr7B	77731546	77732985
